# Supplementary material for: Seminatural Grasslands: An Emblematic Challenge for Nature Conservation in Protected Areas
Source: MDPI journal article supplement (doi:10.3390/land13030386), 2024-03-18
Supplement: s1 [file s1]

**Table S1.** List of the grassland types identified in the surveyed pastures and mowed/grazed meadows in the study area; Annex I Habitat types refer to the 92/43/EEC 'Habitats' Directive and their interpretation follows the official European [58] and national sources [59,99]; altitude and aspect have been recorded in the field.

| ID         | Grassland type                                                                                                                                                                                                     | Annex I Habitat | Altitude (av±sd) | Prevalent Aspect |
|------------|--------------------------------------------------------------------------------------------------------------------------------------------------------------------------------------------------------------------|-----------------|------------------|------------------|
| 1.Pot_Bra  | <i>Potentillo rigoanae-Brachypodium genuens</i> Lucchese, Persia e Pignatti 1995                                                                                                                                   | 6210            | 1602±88          | N                |
| 2.Poo_Fes  | <i>Poo alpinae-Festucetum circummediterraneae</i> Biondi, Ballelli, Allegrezza, Frattaroli & Taffetani 1992                                                                                                        | 6210            | 1712±73          | N, S             |
| 3.Fes_mic  | grassland dominated by <i>Festuca rubra</i> subsp. <i>microphylla</i>                                                                                                                                              | 6210            | 1775±173         | N, W             |
| 4.Luz_Nar  | <i>Luzulo italicae-Nardetum strictae</i> Biondi, Ballelli, Allegrezza, Frattaroli & Taffetani 1992 <i>caricetosum kitaibeliana</i> Biondi, Ballelli, Allegrezza, Taffetani, Frattaroli, Guitian et Zuccarello 1999 | 6230*           | 2371±2           | S                |
| 5.Tar_Tri  | <i>Taraxaco apenninii-Trifolietum thalii</i> Biondi, Allegrezza, Frattaroli, Taffetani 1992 <i>gnaphalietosum magellensis</i> Blasi, Di Pietro, Pelino 2005                                                        | 6170            | 2383±3           | indifferent      |
| 6.Poo_Nar  | <i>Poo violaceae-Nardetum strictae</i> Pedrotti 1981 <i>festucetosum circummediterraneae</i> Biondi, Ballelli, Allegrezza, Taffetani, Frattaroli, Guitian et Zuccarello 1999                                       | 6230*           | 1776±7           | W                |
| 7.Koe_Bro  | <i>Koelerio splendentis-Brometum erecti</i> Biondi, Ballelli, Allegrezza, Frattaroli, Taffetani 1992                                                                                                               | 6210            | 1567±121         | W, S             |
| 8.Ses_Bro  | <i>Seslerio nitidae-Brometum erecti</i> Bruno in Bruno et Covarelli 1968 variant with a <i>Stipa apenninicola</i>                                                                                                  | 6210            | 1441±219         | S, W             |
| 9.Ast_Ses  | <i>Astragalo sempervirentis-Seslerietum nitidae</i> Biondi & Ballelli 1995 variant with <i>Centaurea tenoreana</i>                                                                                                 | 6210            | 1381±69          | S                |
| 10.Ses_ape | <i>Seslerietum apenninae</i> Furnari 1961 corr. Furnari 1966                                                                                                                                                       | 6170            | 1924±83          | S, E             |
| 11.Asp_Bro | <i>Asperulo purpureae-Brometum erecti</i> Biondi et Ballelli 1981 ex Biondi, Ballelli, Allegrezza et Zuccarello 1995"                                                                                              | 6210            | 1142±135         | S, E             |
| 12.Ant_Bra | grassland dominated by <i>Anthoxanthum odoratum</i> and <i>Brachypodium rupestre</i>                                                                                                                               | 6210            | 1167±94          | W, N             |
| 13.Pol_Bra | <i>Polygalo mediterraneae-Brachypodium rupestris</i> Di Pietro, Conte et Iamónico 2014                                                                                                                             | 6210            | 1027±248         | N, E             |
| 14.Bri_Bro | <i>Brizo mediae-Brometum erecti</i> Bruno in Bruno et Covarelli 1968 corr. Biondi et Ballelli 1982                                                                                                                 | 6210            | 1283±14          | S, N             |
| 15.Alo_pra | Mowed/grazed meadows with <i>Alopecurus pratensis</i> and <i>Cynosurus cristatus</i>                                                                                                                               | -               | 1277±59          | E, S             |
| 16.Cyn_cri | Mowed/grazed meadows with <i>Cynosurus cristatus</i>                                                                                                                                                               | -               | 1330±23          | W, N             |
| 17.Alo_ren | Mowed/grazed meadows with <i>Alopecurus rendlei</i>                                                                                                                                                                | -               | 1256±3           | indifferent      |

**Table S2.** Syntaxonomic scheme used to categorize the grassland types found in the surveyed pastures and mowed/grazed meadows in the study area. The classes are interpreted according to the Prodrome of Italian Vegetation [96 and subsequent updates, symbolized by \*] and the European Vegetation Checklist [97, symbolized by °). The types of grassland are listed in bold, with their corresponding ID codes on the right column.

|                                                                                                                                                                                                                      |             |
|----------------------------------------------------------------------------------------------------------------------------------------------------------------------------------------------------------------------|-------------|
| *FESTUCO VALESIIACAE-BROMETEA ERECTI Br.-Bl. et Tuxen ex Br.-Bl. 1949                                                                                                                                                |             |
| PHLEO AMBIGUI-BROMETALIA ERECTI Biondi, Allegrezza, Blasi et Galdenzi in Biondi, Allegrezza, Casavecchia, Galdenzi, Gasparri, Pesaresi, Vagge et Blasi 2014                                                          |             |
| Polygalo mediterraneae-Bromion erecti (Biondi, Allegrezza et Zuccarello 2005) Di Pietro in Di Pietro, Theurillat, Capelo, Fernández- González, Terzi, Carni et Mucina 2015                                           |             |
| <b>Polygalo mediterraneae-Brachypodietum rupestris</b> Di Pietro, Conte et Iamónico 2014                                                                                                                             | 13. Pol_Bra |
| Phleo ambigu-Bromion erecti Biondi, Ballelli, Allegrezza et Zuccarello ex Biondi et Galdenzi 2012                                                                                                                    |             |
| Phleo ambigu-Bromion erecti Biondi, Allegrezza et Zuccarello ex Di Pietro 2011                                                                                                                                       |             |
| <b>Asperulo purpureae-Brometum erecti</b> Biondi et Ballelli 1981 ex Biondi, Ballelli, Allegrezza et Zuccarello 1995                                                                                                 | 11. Asp_Bro |
| <b>grassland dominated by Anthoxanthum odoratum and Brachypodium rupestre</b>                                                                                                                                        | 12. Ant_Bra |
| Brachypodenion genuensis Biondi, Ballelli, Allegrezza et Zuccarello ex Biondi et Galdenzi 2012                                                                                                                       |             |
| <b>Brizo mediae-Brometum erecti</b> Bruno in Bruno et Covarelli 1968 corr. Biondi et Ballelli 1982                                                                                                                   | 14. Bri_Bro |
| <b>Koelerio splendens-Brometum erecti</b> Biondi, Ballelli, Allegrezza, Frattaroli, Taffetani 1992                                                                                                                   | 7. Koe_Bro  |
| <b>Astragalo sempervirentis-Seslerietum nitidae</b> Biondi & Ballelli 1995 variant with <i>Centaurea tenoreana</i>                                                                                                   | 9. Ast_Ses  |
| <b>Seslerio nitidae-Brometum erecti</b> Bruno in Bruno et Covarelli 1968 variant with <i>Stipa dasyvaginata</i> subsp. <i>apenninica</i>                                                                             | 8. Ses_Bro  |
| <b>grassland dominated by Festuca rubra</b> subsp. <i>microphylla</i>                                                                                                                                                | 3. Fes_rub  |
| <b>Poo alpinae-Festucetum circummediterraneae</b> Biondi, Ballelli, Allegrezza, Frattaroli et Taffetani 1992                                                                                                         | 2. Poo_Fes  |
| <b>Potentillo rigosae-Brachypodietum genuensis</b> Lucchese, Persia et Pignatti 1995                                                                                                                                 | 1. Pot_Bra  |
| °ELYNO-SESLERIETEA Br.-Bl. 1948                                                                                                                                                                                      |             |
| Seslerietalia tenuifoliae Horvat 1930                                                                                                                                                                                |             |
| Seslerion apenninae Furnari in Bruno et Furnari 1966                                                                                                                                                                 |             |
| Seslerienion apenninae Blasi, Di Pietro, Fortini et Catonica 2003                                                                                                                                                    |             |
| <b>Seslerietum apenninae</b> Furnari 1961 corr. Furnari 1966                                                                                                                                                         | 10. Ses_ape |
| *NARDETEA STRICTAE Rivas Goday in Rivas Goday et Rivas-Martínez 1963                                                                                                                                                 |             |
| NARDEALIA STRICTAE Oberdorfer ex Preising 1949                                                                                                                                                                       |             |
| Ranunculo pollinensis-Nardion strictae Bonin 1972                                                                                                                                                                    |             |
| <b>Poo violaceae-Nardetum strictae</b> Pedrotti 1981 <i>festucetosum circummediterraneae</i> Biondi, Ballelli, Allegrezza, Taffetani, Frattaroli, Guitian et Zuccarello 1999                                         | 6. Poo_Nar  |
| <b>Luzulo italicae-Nardetum strictae</b> Biondi, Ballelli, Allegrezza, Frattaroli et Taffetani 1992 <i>caricetosum kitaibelianae</i> Biondi, Ballelli, Allegrezza, Taffetani, Frattaroli, Guitian et Zuccarello 1999 | 4. Luz_Nar  |
| <b>Taraxaco apenninii-Trifolietum thalii</b> Biondi, Ballelli, Allegrezza, Frattaroli et Taffetani 1992 <i>gnaphalietosum magellensis</i> Blasi, Di Pietro et Pelino 2005                                            | 5. Tar_ape  |
| °MOLINIO-ARRHENATHERETEA Tx. 1937                                                                                                                                                                                    |             |
| ARRHENATHERETALIA ELATIORIS Tx. 1931                                                                                                                                                                                 |             |
| Cynosurion cristati Tx. 1947                                                                                                                                                                                         |             |
| <b>mowed/grazed meadows dominated by Alopecurus pratensis and Cynosurus cristatus</b>                                                                                                                                | 15. Alo_pra |
| <b>mowed/grazed meadows dominated by Cynosurus cristatus</b>                                                                                                                                                         | 16. Cyn_cri |
| TRIFOLIO-HORDEETALIA Horvatić 1963                                                                                                                                                                                   |             |
| Molinio-Hordeion secalini Horvatić 1934 (syn.: <i>Alopecurion utriculati</i> Zeidler 1954)                                                                                                                           |             |
| <b>mowed/grazed meadows dominated by Alopecurus rendlei</b>                                                                                                                                                          | 17. Alo_ren |

**Table S3.** Dominant species (average cover >10%; in bold species with average cover >15%; average cover  $\pm$  standard deviation are reported) and Indicator Species Analysis results [association values > 0.5; in bold species with values of association values > 0.7; 'indicspecies' package for "R", version 1.7.12, Association function: IndVal.g, minimum statistic value (minstat): 0.5, permutations: 9999] for the 17 identified grassland types.

| Grassland Type: 1.Pot_Bra                                                                                     |              |               |            |                                                                                   |
|---------------------------------------------------------------------------------------------------------------|--------------|---------------|------------|-----------------------------------------------------------------------------------|
| Indicator species                                                                                             |              |               |            | Dominant species                                                                  |
| species with stat>0.5: 15                                                                                     | stat         | p.value       |            |                                                                                   |
| species with stat>0.7: 3                                                                                      |              |               |            |                                                                                   |
| <b>Dianthus hyssopifolius L.</b>                                                                              | <b>0.707</b> | <b>0.0016</b> | <b>**</b>  | <b>Brachypodium genuense (DC.) Roem. &amp; Schult. (46.7<math>\pm</math>16.6)</b> |
| <b>Geranium rotundifolium L.</b>                                                                              | <b>0.707</b> | <b>0.0017</b> | <b>**</b>  | <b>Bromopsis erecta (Huds.) Fourr. s.l. (16.8<math>\pm</math>11.9)</b>            |
| <b>Luzula multiflora (Ehrh.) Lej. subsp. multiflora</b>                                                       | <b>0.707</b> | <b>0.0016</b> | <b>**</b>  | <b>Festuca circummediterranea Patzke (12.3<math>\pm</math>5.2)</b>                |
| Cynoglossum magellense Ten.                                                                                   | 0.654        | 0.0006        | ***        |                                                                                   |
| Leontodon hispidus L. subsp. dubius (Hoppe) Pawłowska                                                         | 0.653        | 0.0040        | **         |                                                                                   |
| Silene roemerii Friv. subsp. staminea (Bertol.) Nyman                                                         | 0.653        | 0.0031        | **         |                                                                                   |
| Verbascum densiflorum Bertol.                                                                                 | 0.631        | 0.0045        | **         |                                                                                   |
| Genista sagittalis L.                                                                                         | 0.577        | 0.0087        | **         |                                                                                   |
| Carlina vulgaris L.                                                                                           | 0.547        | 0.0113        | *          |                                                                                   |
| Carex pairae F.W. Schultz                                                                                     | 0.530        | 0.0078        | **         |                                                                                   |
| Campanula glomerata L.                                                                                        | 0.522        | 0.0160        | *          |                                                                                   |
| Achillea millefolium L.                                                                                       | 0.519        | 0.0128        | *          |                                                                                   |
| Stachys heraclea All.                                                                                         | 0.506        | 0.0181        | *          |                                                                                   |
| Valeriana stolonifera Czern. subsp. angustifolia Soó                                                          | 0.506        | 0.0164        | *          |                                                                                   |
| Brachypodium genuense (DC.) Roem. & Schult.                                                                   | 0.501        | 0.0014        | **         |                                                                                   |
| Grassland Type: 2.Poo_Fes                                                                                     |              |               |            |                                                                                   |
| Indicator species                                                                                             |              |               |            | Dominant species                                                                  |
| species with stat>0.5: 9                                                                                      | stat         | p.value       |            |                                                                                   |
| species with stat>0.7: 1                                                                                      |              |               |            |                                                                                   |
| <b>Armeria gracilis Ten. subsp. gracilis</b>                                                                  | <b>0.733</b> | <b>0.0001</b> | <b>***</b> | <b>Bromopsis erecta (Huds.) Fourr. s.l. (41.1<math>\pm</math>16.7)</b>            |
| Galium parisiense L.                                                                                          | 0.667        | 0.0037        | **         | <b>Festuca circummediterranea Patzke (21.7<math>\pm</math>9.7)</b>                |
| Carduus affinis Guss. subsp. affinis                                                                          | 0.650        | 0.0014        | **         | Brachypodium genuense (DC.) Roem. & Schult. (13.8 $\pm$ 13.0)                     |
| Plantago argentea Chaix subsp. argentea                                                                       | 0.640        | 0.0009        | ***        | <b>Festuca rubra L. subsp. microphylla St.-Yves (13.0<math>\pm</math>13.6)</b>    |
| Carex caryophyllea Latourr.                                                                                   | 0.630        | 0.0013        | **         |                                                                                   |
| Galium anisophyllum Vill.                                                                                     | 0.627        | 0.0022        | **         |                                                                                   |
| Helianthemum nummularium (L.) Mill. subsp. obscurum (Čelak.) Holub                                            | 0.595        | 0.0026        | **         |                                                                                   |
| Nocca brachypetala (Jord.) F.K. Mey.                                                                          | 0.577        | 0.0034        | **         |                                                                                   |
| Trifolium pratense L. subsp. semipurpureum (Strobl) Pignatti                                                  | 0.518        | 0.0051        | **         |                                                                                   |
| Grassland Type: 3.Fes_mic                                                                                     |              |               |            |                                                                                   |
| Indicator species                                                                                             |              |               |            | Dominant species                                                                  |
| species with stat>0.5: 3                                                                                      | stat         | p.value       |            |                                                                                   |
| species with stat>0.7: 0                                                                                      |              |               |            |                                                                                   |
| Armeria gracilis Ten. subsp. majellensis (Boiss.) Arrigoni                                                    | 0.636        | 0.0014        | **         | <b>Festuca rubra L. subsp. microphylla St.-Yves (37.8<math>\pm</math>21.7)</b>    |
| Cynanchica aristata (L.f.) P.Caputo & Del Guacchio subsp. aristata                                            | 0.552        | 0.0068        | **         | <b>Bromopsis erecta (Huds.) Fourr. s.l. (16.7<math>\pm</math>16.6)</b>            |
| Festuca centroaemennica (Markgr.-Dann.) Foggi, F.Conti & Pignatti                                             | 0.548        | 0.0059        | **         |                                                                                   |
| Grassland Type: 4.Luz_Nar                                                                                     |              |               |            |                                                                                   |
| Indicator species                                                                                             |              |               |            | Dominant species                                                                  |
| species with stat>0.5: 13                                                                                     | stat         | p.value       |            |                                                                                   |
| species with stat>0.7: 6                                                                                      |              |               |            |                                                                                   |
| Gentiana nivalis L.                                                                                           | 1.000        | 0.0001        | ***        | <b>Nardus stricta L. (63.3<math>\pm</math>20.8)</b>                               |
| Erigeron epiroticus (Vierh.) Halácsy                                                                          | 0.964        | 0.0001        | ***        | Poa alpina L. subsp. alpina (15.0 $\pm$ 0.0)                                      |
| <b>Luzula spicata (L.) DC. subsp. bulgarica (Chrtk &amp; Křisa) Gamisans</b>                                  | <b>0.949</b> | <b>0.0001</b> | <b>***</b> | <b>Ranunculus pollinensis (N.Terracc.) Chiov. (10.0<math>\pm</math>4.4)</b>       |
| <b>Pilosella hoppeana (Schult.) F.W.Schultz &amp; Sch.Bip. subsp. macrantha (Ten.) S.Bräut. &amp; Greuter</b> | <b>0.849</b> | <b>0.0001</b> | <b>***</b> | <b>Festuca rubra L. subsp. microphylla St.-Yves (10.0<math>\pm</math>8.7)</b>     |
| <b>Trifolium pratense L. subsp. nivale Ces.</b>                                                               | <b>0.791</b> | <b>0.0001</b> | <b>***</b> |                                                                                   |
| <b>Nardus stricta L.</b>                                                                                      | <b>0.711</b> | <b>0.0005</b> | <b>***</b> |                                                                                   |
| Ranunculus pollinensis (N.Terracc.) Chiov.                                                                    | 0.684        | 0.0001        | ***        |                                                                                   |
| Cerastium aroense L. subsp. strictum (W.D.J.Koch) Gremli                                                      | 0.650        | 0.0010        | ***        |                                                                                   |
| Potentilla crantzii (Crantz) Beck ex Fritsch subsp. crantzii                                                  | 0.637        | 0.0043        | **         |                                                                                   |
| Campanula micrantha Bertol.                                                                                   | 0.594        | 0.0021        | **         |                                                                                   |
| Botrychium lunaria (L.) Sw.                                                                                   | 0.553        | 0.0118        | *          |                                                                                   |
| Ranunculus apenninus (Chiov.) Pignatti                                                                        | 0.527        | 0.0368        | *          |                                                                                   |
| Poa alpina L. subsp. alpina                                                                                   | 0.517        | 0.0011        | **         |                                                                                   |
| Grassland Type: 5.Tar_Tri                                                                                     |              |               |            |                                                                                   |
| Indicator species                                                                                             |              |               |            | Dominant species                                                                  |
| species with stat>0.5: 13                                                                                     | stat         | p.value       |            |                                                                                   |
| species with stat>0.7: 6                                                                                      |              |               |            |                                                                                   |

|                                                                                                                 |       |         |     |                                                                                                  |  |
|-----------------------------------------------------------------------------------------------------------------|-------|---------|-----|--------------------------------------------------------------------------------------------------|--|
| species with stat>0.5: 8                                                                                        |       |         |     |                                                                                                  |  |
| species with stat>0.7: 5                                                                                        |       |         |     |                                                                                                  |  |
| <i>Taraxacum glaciale</i> É. Huet & A. Huet ex Hand.-Mazz.                                                      | 0.931 | 0.0001  | *** | <i>Trifolium thalii</i> Vill. (55.7±4.0)                                                         |  |
| <i>Trifolium thalii</i> Vill.                                                                                   | 0.862 | 0.0001  | *** | <i>Scorzoneroideis montana</i> (Lam.) Holub subsp. <i>breviscapa</i> (DC.) Greuter (20±17.3)     |  |
| <i>Plantago atrata</i> Hoppe subsp. <i>fuscescens</i> (Jord.) Pilg.                                             | 0.816 | 0.0009  | *** | <i>Plantago atrata</i> Hoppe subsp. <i>atrata</i> (11.0±3.6)                                     |  |
| <i>Scorzoneroideis montana</i> (Lam.) Holub subsp. <i>breviscapa</i> (DC.) Greuter                              | 0.816 | 0.0009  | *** |                                                                                                  |  |
| <i>Taraxacum apenninum</i> (Ten.) DC.                                                                           | 0.816 | 0.0006  | *** |                                                                                                  |  |
| <i>Plantago atrata</i> Hoppe subsp. <i>atrata</i>                                                               | 0.673 | 0.0007  | *** |                                                                                                  |  |
| <i>Phleum rhaeticum</i> (Humphries) Rauschert                                                                   | 0.659 | 0.0035  | **  |                                                                                                  |  |
| <i>Sabulina verna</i> (L.) Rchb. subsp. <i>verna</i>                                                            | 0.629 | 0.0015  | **  |                                                                                                  |  |
| Grassland Type: 6.Poo_Nar                                                                                       |       |         |     |                                                                                                  |  |
| Indicator species                                                                                               |       |         |     |                                                                                                  |  |
| species with stat>0.5: 14                                                                                       | stat  | p.value |     | Dominant species                                                                                 |  |
| species with stat>0.7: 9                                                                                        |       |         |     |                                                                                                  |  |
| <i>Veronica serpyllifolia</i> L.                                                                                | 1.000 | 0.0001  | *** | <i>Nardus stricta</i> L. (57.5±6.9)                                                              |  |
| <i>Verbascum thapsus</i> L. subsp. <i>thapsus</i>                                                               | 0.978 | 0.0001  | *** |                                                                                                  |  |
| <i>Omalotheca sylvatica</i> (L.) Sch.Bip. & F.W.Schultz                                                         | 0.968 | 0.0001  | *** |                                                                                                  |  |
| <i>Ajuga tenorei</i> C.Presl                                                                                    | 0.913 | 0.0001  | *** |                                                                                                  |  |
| <i>Achillea setacea</i> Waldst. & Kit.                                                                          | 0.880 | 0.0001  | *** |                                                                                                  |  |
| <i>Veronica officinalis</i> L.                                                                                  | 0.745 | 0.0001  | *** |                                                                                                  |  |
| <i>Carduus defloratus</i> L. subsp. <i>carlinifolius</i> (Lam.) Ces.                                            | 0.707 | 0.0026  | **  |                                                                                                  |  |
| <i>Dianthus deltoides</i> L. subsp. <i>deltoides</i>                                                            | 0.702 | 0.0001  | *** |                                                                                                  |  |
| <i>Bellardiachloa variegata</i> (Lam.) Kerguélen                                                                | 0.702 | 0.0006  | *** |                                                                                                  |  |
| <i>Agrostis capillaris</i> L. subsp. <i>capillaris</i>                                                          | 0.614 | 0.0010  | *** |                                                                                                  |  |
| <i>Rumex nebroides</i> Campd.                                                                                   | 0.601 | 0.0018  | **  |                                                                                                  |  |
| <i>Helleborus viridis</i> L. subsp. <i>bocconeii</i> (Ten.) Peruzzi                                             | 0.577 | 0.0086  | **  |                                                                                                  |  |
| <i>Sagina alexandrae</i> Iamónico                                                                               | 0.577 | 0.0081  | **  |                                                                                                  |  |
| <i>Stachys germanica</i> L.                                                                                     | 0.516 | 0.0197  | *   |                                                                                                  |  |
| Grassland Type: 7.Koe_Bro                                                                                       |       |         |     |                                                                                                  |  |
| Indicator species                                                                                               |       |         |     |                                                                                                  |  |
| species with stat>0.5: 3                                                                                        | stat  | p.value |     | Dominant species                                                                                 |  |
| species with stat>0.7: 0                                                                                        |       |         |     |                                                                                                  |  |
| <i>Koeleria splendens</i> C.Presl                                                                               | 0.648 | 1e-04   | *** | <i>Bromopsis erecta</i> (Huds.) Fourr. s.l. (20.0±18.7)                                          |  |
| <i>Petrosedum rupestre</i> (L.) P.V.Heath                                                                       | 0.638 | 9e-04   | *** | <i>Festuca circummediterranea</i> Patzke (16.2±12.5)                                             |  |
| <i>Petrorhagia saxifraga</i> (L.) Link                                                                          | 0.545 | 1e-04   | *** |                                                                                                  |  |
| Grassland Type: 8.Ses_Bro                                                                                       |       |         |     |                                                                                                  |  |
| Indicator species                                                                                               |       |         |     |                                                                                                  |  |
| species with stat>0.5: 16                                                                                       | stat  | p.value |     | Dominant species                                                                                 |  |
| species with stat>0.7: 4                                                                                        |       |         |     |                                                                                                  |  |
| <i>Plantago subulata</i> L.                                                                                     | 0.745 | 0.0004  | *** | <i>Sesleria nitida</i> Ten. (17.1±14.1)                                                          |  |
| <i>Paronychia kapela</i> (Hacq.) A. Kern.                                                                       | 0.731 | 0.0005  | *** | <i>Stipa dasyvaginata</i> Martinovský subsp. <i>apenninica</i> Martinovský & Moraldo (11.1±20.1) |  |
| <i>Teucrium montanum</i> L.                                                                                     | 0.716 | 0.0001  | *** | <i>Sesleria juncifolia</i> Wulfen ex Suffren subsp. <i>juncifolia</i> (11.0±20.7)                |  |
| <i>Cytisus spinescens</i> Sieber ex Spreng.                                                                     | 0.713 | 0.0001  | *** |                                                                                                  |  |
| <i>Helianthemum apenninum</i> (L.) Mill. subsp. <i>apenninum</i>                                                | 0.671 | 0.0010  | *** |                                                                                                  |  |
| <i>Globularia cordifolia</i> L. subsp. <i>bellidifolia</i> (Nyman) Wettst.                                      | 0.600 | 0.0008  | *** |                                                                                                  |  |
| <i>Stipa dasyvaginata</i> Martinovský subsp. <i>apenninica</i> Martinovský & Moraldo                            | 0.584 | 0.0020  | **  |                                                                                                  |  |
| <i>Centaurea ceratophylla</i> Ten. subsp. <i>ceratophylla</i>                                                   | 0.546 | 0.0164  | *   |                                                                                                  |  |
| <i>Allium sphaerocephalon</i> L.                                                                                | 0.540 | 0.0145  | *   |                                                                                                  |  |
| <i>Pimpinella tragium</i> Vill.                                                                                 | 0.539 | 0.0040  | **  |                                                                                                  |  |
| <i>Anthyllis vulneraria</i> L. subsp. <i>polyphylla</i> (DC.) Nyman                                             | 0.535 | 0.0142  | *   |                                                                                                  |  |
| <i>Cynanchica pyrenaica</i> (L.) P.Caputo & Del Guacchio subsp. <i>neglecta</i> (Guss.) P.Caputo & Del Guacchio | 0.535 | 0.0142  | *   |                                                                                                  |  |
| <i>Astragalus damicus</i> Retz.                                                                                 | 0.535 | 0.0302  | *   |                                                                                                  |  |
| <i>Oxytropis neglecta</i> J.Gay ex Ten.                                                                         | 0.535 | 0.0380  | *   |                                                                                                  |  |
| <i>Petrosedum montanum</i> (Songeon & E.P.Perrier) Grulich                                                      | 0.535 | 0.0300  | *   |                                                                                                  |  |
| <i>Sabulina glauca</i> (Dvořáková) Dillenb. & Kadereit                                                          | 0.535 | 0.0156  | *   |                                                                                                  |  |
| Grassland Type: 9.Ast_Ses                                                                                       |       |         |     |                                                                                                  |  |
| Indicator species                                                                                               |       |         |     |                                                                                                  |  |
| species with stat>0.5: 11                                                                                       | stat  | p.value |     | Dominant species                                                                                 |  |
| species with stat>0.7: 4                                                                                        |       |         |     |                                                                                                  |  |
| <i>Centaurea tenoreana</i> Willk.                                                                               | 0.900 | 0.0001  | *** | <i>Sesleria nitida</i> Ten. (57.0±10.4)                                                          |  |
| <i>Astragalus monspessulanus</i> L. subsp. <i>monspessulanus</i>                                                | 0.894 | 0.0001  | *** |                                                                                                  |  |
| <i>Lomelosia crenata</i> (Cirillo) Greuter & Burdet subsp. <i>pseudisetensis</i> (Lacaita) Greuter & Burdet     | 0.712 | 0.0010  | *** |                                                                                                  |  |
| <i>Ononis spinosa</i> L.                                                                                        | 0.706 | 0.0005  | *** |                                                                                                  |  |
| <i>Sesleria nitida</i> Ten.                                                                                     | 0.690 | 0.0002  | *** |                                                                                                  |  |

|                                                                                                                |       |         |     |                                                                                                  |
|----------------------------------------------------------------------------------------------------------------|-------|---------|-----|--------------------------------------------------------------------------------------------------|
| <i>Coronilla minima</i> L. subsp. <i>minima</i>                                                                | 0.653 | 0.0009  | *** |                                                                                                  |
| <i>Cuscuta epithymum</i> (L.) L.                                                                               | 0.626 | 0.0019  | **  |                                                                                                  |
| <i>Onobrychis alba</i> (Waldst. & Kit.) Desv.                                                                  | 0.575 | 0.0069  | **  |                                                                                                  |
| <i>Vicia onobrychioides</i> L.                                                                                 | 0.537 | 0.0070  | **  |                                                                                                  |
| <i>Dianthus virgineus</i> L.                                                                                   | 0.535 | 0.0032  | **  |                                                                                                  |
| <i>Astragalus sempervirens</i> Lam.                                                                            | 0.506 | 0.0145  | *   |                                                                                                  |
| <b>Grassland Type: 10.Ses_ape</b>                                                                              |       |         |     |                                                                                                  |
| Indicator species                                                                                              |       |         |     | Dominant species                                                                                 |
| species with stat>0.5: 20                                                                                      | stat  | p.value |     |                                                                                                  |
| species with stat>0.7: 12                                                                                      |       |         |     |                                                                                                  |
| <i>Juniperus communis</i> L. var. <i>saxatilis</i> Pall.                                                       | 1.000 | 0.0001  | *** | <i>Sesleria juncifolia</i> Wulfen ex Suffren subsp. <i>juncifolia</i> (45.7±27.4)                |
| <i>Edraianthus graminifolius</i> (L.) A.DC. ex Meisn. subsp. <i>graminifolius</i>                              | 0.941 | 0.0001  | *** | <i>Sesleria nitida</i> Ten. (14.7±20.1)                                                          |
| <i>Festuca laevigata</i> Gaudin                                                                                | 0.940 | 0.0001  | *** | <i>Bromopsis erecta</i> (Huds.) Fourr. s.l. (14.0±5.9)                                           |
| <i>Arctostaphylos uva-ursi</i> (L.) Spreng.                                                                    | 0.913 | 0.0001  | *** | <i>Festuca laevigata</i> Gaudin (12.5±4.2)                                                       |
| <i>Carex humilis</i> Leyss.                                                                                    | 0.913 | 0.0002  | *** | <i>Helianthemum oelandicum</i> (L.) Dum.Cours. subsp. <i>incanum</i> (Willk.) G.López (10.3±4.2) |
| <i>Pedicularis elegans</i> Ten.                                                                                | 0.886 | 0.0002  | *** |                                                                                                  |
| <i>Anthyllis montana</i> L. subsp. <i>jacquini</i> (A.Kern.) Rohlena                                           | 0.827 | 0.0001  | *** |                                                                                                  |
| <i>Anthyllis vulneraria</i> L. subsp. <i>pulchella</i> (Vis.) Bornm.                                           | 0.816 | 0.0002  | *** |                                                                                                  |
| <i>Trinia glauca</i> (L.) Dumort.                                                                              | 0.775 | 0.0002  | *** |                                                                                                  |
| <i>Gymnadenia conopsea</i> (L.) R.Br.                                                                          | 0.714 | 0.0003  | *** |                                                                                                  |
| <i>Sesleria juncifolia</i> Wulfen ex Suffren subsp. <i>juncifolia</i>                                          | 0.712 | 0.0004  | *** |                                                                                                  |
| <i>Cynanchica aristata</i> (L.f.) P.Caputo & Del Guacchio subsp. <i>scabra</i> (Nyman) P.Caputo & Del Guacchio | 0.707 | 0.0025  | **  |                                                                                                  |
| <i>Helianthemum nummularium</i> (L.) Mill. subsp. <i>grandiflorum</i> (Scop.) Schinz & Thell.                  | 0.677 | 0.0002  | *** |                                                                                                  |
| <i>Bupleurum falcatum</i> L. subsp. <i>cernuum</i> (Nyman) Arcang.                                             | 0.671 | 0.0009  | *** |                                                                                                  |
| <i>Thymus striatus</i> Vahl subsp. <i>acicularis</i> (Waldst. & Kit.) Ronniger                                 | 0.645 | 0.0010  | *** |                                                                                                  |
| <i>Helianthemum oelandicum</i> (L.) Dum.Cours. subsp. <i>incanum</i> (Willk.) G.López                          | 0.636 | 0.0002  | *** |                                                                                                  |
| <i>Gentiana dinarica</i> Beck                                                                                  | 0.577 | 0.0076  | **  |                                                                                                  |
| <i>Pulsatilla alpina</i> (L.) Delarbre subsp. <i>millefoliata</i> (Bertol.) D.M.Moser                          | 0.577 | 0.0076  | **  |                                                                                                  |
| <i>Carex kitaibeliana</i> Degen ex Bech.                                                                       | 0.574 | 0.0118  | *   |                                                                                                  |
| <i>Lotus corniculatus</i> L. subsp. <i>alpinus</i> (DC.) Rothm.                                                | 0.506 | 0.0182  | *   |                                                                                                  |
| <b>Grassland Type: 11.Asp_Bro</b>                                                                              |       |         |     |                                                                                                  |
| Indicator species                                                                                              |       |         |     | Dominant species                                                                                 |
| species with stat>0.5: 9                                                                                       | stat  | p.value |     |                                                                                                  |
| species with stat>0.7: 0                                                                                       |       |         |     |                                                                                                  |
| <i>Bupleurum baldense</i> Turra                                                                                | 0.596 | 0.0019  | **  | <i>Bromopsis erecta</i> (Huds.) Fourr. s.l. (31.2±15.3)                                          |
| <i>Stachys germanica</i> subsp. <i>salviifolia</i> (Ten.) Gams                                                 | 0.595 | 0.0048  | **  | <i>Festuca circummediterranea</i> Patzke (24.6±19.5)                                             |
| <i>Phleum hirsutum</i> Honck. subsp. <i>ambiguum</i> (Ten.) Cif. & Giacom.                                     | 0.591 | 0.0001  | *** |                                                                                                  |
| <i>Centaurea scabiosa</i> L.                                                                                   | 0.542 | 0.0092  | **  |                                                                                                  |
| <i>Pilosella acutifolia</i> (Vill.) Arv.-Touv.                                                                 | 0.542 | 0.0087  | **  |                                                                                                  |
| <i>Trifolium scabrum</i> L.                                                                                    | 0.531 | 0.0024  | **  |                                                                                                  |
| <i>Poterium sanguisorba</i> L. subsp. <i>balearicum</i> (Bourg. ex Nyman) Stace                                | 0.527 | 0.0001  | *** |                                                                                                  |
| <i>Thliphthisa purpurea</i> (L.) P.Caputo & Del Guacchio subsp. <i>purpurea</i>                                | 0.521 | 0.0058  | **  |                                                                                                  |
| <i>Helichrysum italicum</i> (Roth) G.Don subsp. <i>italicum</i>                                                | 0.510 | 0.0134  | *   |                                                                                                  |
| <b>Grassland Type: 12.Ant_Bra</b>                                                                              |       |         |     |                                                                                                  |
| Indicator species                                                                                              |       |         |     | Dominant species                                                                                 |
| species with stat>0.5: 11                                                                                      | stat  | p.value |     |                                                                                                  |
| species with stat>0.7: 1                                                                                       |       |         |     |                                                                                                  |
| <i>Centaurea ambigua</i> Guss. subsp. <i>ambigua</i>                                                           | 0.750 | 0.0001  | *** | <i>Anthoxanthum odoratum</i> L. (31.7±11.5)                                                      |
| <i>Cota tinctoria</i> (L.) J.Gay subsp. <i>australis</i> (R.Fern.) Oberpr. & Greuter                           | 0.645 | 0.0035  | **  | <i>Bromopsis erecta</i> (Huds.) Fourr. s.l. (27.9±22.3)                                          |
| <i>Dianthus carthusianorum</i> L. subsp. <i>tenorei</i> (Lacaita) Pignatti                                     | 0.645 | 0.0036  | **  | <i>Festuca circummediterranea</i> Patzke (24.6±12.1)                                             |
| <i>Galium lucidum</i> All. subsp. <i>lucidum</i>                                                               | 0.609 | 0.0001  | *** |                                                                                                  |
| <i>Teucrium chamaedrys</i> L.                                                                                  | 0.595 | 0.0001  | *** |                                                                                                  |
| <i>Hypericum perforatum</i> L. subsp. <i>veronense</i> (Schrank) Ces.                                          | 0.577 | 0.0045  | **  |                                                                                                  |
| <i>Scabiosa columbaria</i> L.                                                                                  | 0.548 | 0.0023  | **  |                                                                                                  |
| <i>Origanum vulgare</i> L.                                                                                     | 0.535 | 0.0108  | *   |                                                                                                  |
| <i>Odontites vernus</i> (Bellardi) Dumort. subsp. <i>serotinus</i> (Dumort.) Corb.                             | 0.531 | 0.0151  | *   |                                                                                                  |
| <i>Tordylium apulum</i> L.                                                                                     | 0.500 | 0.0164  | *   |                                                                                                  |

|                                                                                   |       |         |     |                                                                       |
|-----------------------------------------------------------------------------------|-------|---------|-----|-----------------------------------------------------------------------|
| <i>Trifolium incarnatum</i> L. subsp. <i>molinerii</i> (Balb. ex Hornem.) Ces.    | 0.500 | 0.0283  | *   |                                                                       |
| <b>Grassland Type: 13.Pol_Bra</b>                                                 |       |         |     |                                                                       |
| Indicator species                                                                 |       |         |     |                                                                       |
| species with stat>0.5: 4                                                          | stat  | p.value |     | Dominant species                                                      |
| species with stat>0.7: 0                                                          |       |         |     |                                                                       |
| <i>Agrimonia eupatoria</i> L. subsp. <i>eupatoria</i>                             | 0.566 | 0.0025  | **  | <i>Bromopsis erecta</i> (Huds.) Fourr. s.l. (33.8±11.6)               |
| <i>Lolium arundinaceum</i> (Schreb.) Darbysh.                                     | 0.550 | 0.0041  | **  | <i>Brachypodium rupestre</i> (Host) Roem. & Schult. (23.7±13.1)       |
| <i>Dactylis glomerata</i> L.                                                      | 0.518 | 0.0008  | *** |                                                                       |
| <i>Pilosella piloselloides</i> (Vill.) Soják subsp. <i>piloselloides</i>          | 0.508 | 0.0112  | *   |                                                                       |
| <b>Grassland Type: 14.Bri_Bro</b>                                                 |       |         |     |                                                                       |
| Indicator species                                                                 |       |         |     |                                                                       |
| species with stat>0.5: 22                                                         | stat  | p.value |     | Dominant species                                                      |
| species with stat>0.7: 5                                                          |       |         |     |                                                                       |
| <i>Equisetum arvense</i> L.                                                       | 0.756 | 0.0002  | *** | <i>Bromopsis erecta</i> (Huds.) Fourr. s.l. (31.4±6.3)                |
| <i>Briza media</i> L.                                                             | 0.751 | 0.0001  | *** | <i>Brachypodium rupestre</i> (Host) Roem. & Schult. (27.1±7.0)        |
| <i>Gentiana cruciata</i> L. subsp. <i>cruciata</i>                                | 0.743 | 0.0003  | *** | <i>Briza media</i> L. (20.4±6.7)                                      |
| <i>Prunella laciniata</i> (L.) L.                                                 | 0.723 | 0.0001  | *** | <i>Lotus herbaceus</i> (Vill.) Jauzein (10.6±9.7)                     |
| <i>Carex flacca</i> Schreb. subsp. <i>flacca</i>                                  | 0.712 | 0.0001  | *** |                                                                       |
| <i>Leucanthemum vulgare</i> (Vaill.) Lam. subsp. <i>vulgare</i>                   | 0.686 | 0.0001  | *** |                                                                       |
| <i>Lotus dorycnium</i> L. subsp. <i>herbaceus</i> (Vill.) Kramina & D.D. Sokoloff | 0.672 | 0.0001  | *** |                                                                       |
| <i>Cuscuta epithymum</i> subsp. <i>kotschy</i> (Des Moul.) Arcang.                | 0.655 | 0.0027  | **  |                                                                       |
| <i>Linum viscosum</i> L.                                                          | 0.655 | 0.0027  | **  |                                                                       |
| <i>Polygala nicaeensis</i> Risso ex W.D.J.Koch subsp. <i>mediterranea</i> Chodat  | 0.610 | 0.0001  | *** |                                                                       |
| <i>Centaurea nigrescens</i> Willd. subsp. <i>neapolitana</i> (Boiss.) Dostál      | 0.609 | 0.0039  | **  |                                                                       |
| <i>Trifolium ochroleucon</i> Huds.                                                | 0.609 | 0.0001  | *** |                                                                       |
| <i>Blackstonia perfoliata</i> (L.) Huds.                                          | 0.589 | 0.0021  | **  |                                                                       |
| <i>Linum capitatum</i> Kit. ex Schult. subsp. <i>serrulatum</i> (Bertol.) Hartvig | 0.584 | 0.0043  | **  |                                                                       |
| <i>Daucus carota</i> L. subsp. <i>carota</i>                                      | 0.583 | 0.0002  | *** |                                                                       |
| <i>Scorzonoides cichoriacea</i> (Ten.) Greuter                                    | 0.557 | 0.0001  | *** |                                                                       |
| <i>Brachypodium rupestre</i> (Host) Roem. & Schult.                               | 0.544 | 0.0001  | *** |                                                                       |
| <i>Trifolium echinatum</i> M.Bieb.                                                | 0.535 | 0.0160  | *   |                                                                       |
| <i>Tussilago farfara</i> L.                                                       | 0.535 | 0.0411  | *   |                                                                       |
| <i>Leontodon hispidus</i> L.                                                      | 0.516 | 0.0115  | *   |                                                                       |
| <i>Crepis biennis</i> L.                                                          | 0.511 | 0.0170  | *   |                                                                       |
| <i>Ophioglossum vulgatum</i> L.                                                   | 0.502 | 0.0239  | *   |                                                                       |
| <b>Grassland Type: 15.Alo_pra</b>                                                 |       |         |     |                                                                       |
| Indicator species                                                                 |       |         |     |                                                                       |
| species with stat>0.5: 15                                                         | stat  | p.value |     | Dominant species                                                      |
| species with stat>0.7: 4                                                          |       |         |     |                                                                       |
| <i>Hordeum secalinum</i> Schreb.                                                  | 0.832 | 0.0001  | *** | <i>Cynosurus cristatus</i> L. (29.2±15.8)                             |
| <i>Sanguisorba officinalis</i> L.                                                 | 0.832 | 0.0001  | *** | <i>Anthoxanthum odoratum</i> L. (17.2±12.8)                           |
| <i>Ranunculus marsicus</i> Guss. & Ten.                                           | 0.734 | 0.0005  | *** | <i>Phleum nodosum</i> L. (11.0±7.2)                                   |
| <i>Thalictrum simplex</i> L.                                                      | 0.734 | 0.0002  | *** |                                                                       |
| <i>Bistorta officinalis</i> Delarbre                                              | 0.687 | 0.0007  | *** |                                                                       |
| <i>Lotus tenuis</i> Waldst. & Kit. ex Willd.                                      | 0.662 | 0.0002  | *** |                                                                       |
| <i>Allium vineale</i> L.                                                          | 0.645 | 0.0006  | *** |                                                                       |
| <i>Narcissus poeticus</i> L.                                                      | 0.641 | 0.0030  | **  |                                                                       |
| <i>Vicia tenuifolia</i> Roth                                                      | 0.620 | 0.0058  | **  |                                                                       |
| <i>Rumex acetosa</i> L. subsp. <i>acetosa</i>                                     | 0.578 | 0.0029  | **  |                                                                       |
| <i>Serratula tinctoria</i> L. subsp. <i>tinctoria</i>                             | 0.555 | 0.0051  | **  |                                                                       |
| <i>Centaurea nigrescens</i> Willd. subsp. <i>nigrescens</i>                       | 0.546 | 0.0079  | **  |                                                                       |
| <i>Phleum nodosum</i> L.                                                          | 0.522 | 0.0031  | **  |                                                                       |
| <i>Rhinanthus minor</i> L.                                                        | 0.515 | 0.0002  | *** |                                                                       |
| <i>Poa pratensis</i> L. subsp. <i>pratensis</i>                                   | 0.513 | 0.0072  | **  |                                                                       |
| <b>Grassland Type: 16.Cyn_cri</b>                                                 |       |         |     |                                                                       |
| Indicator species                                                                 |       |         |     |                                                                       |
| species with stat>0.5: 13                                                         | stat  | p.value |     | Dominant species                                                      |
| species with stat>0.7: 1                                                          |       |         |     |                                                                       |
| <i>Bellis perennis</i> L.                                                         | 0.734 | 0.0001  | *** | <i>Cynosurus cristatus</i> L. (24.3±11.7)                             |
| <i>Carduus nutans</i> L. subsp. <i>perspinosus</i> (Fiori) Arènes                 | 0.693 | 0.0017  | **  | <i>Trifolium repens</i> L. (12.0±14.1)                                |
| <i>Potentilla reptans</i> L.                                                      | 0.662 | 0.0002  | *** | <i>Festuca rubra</i> L. subsp. <i>microphylla</i> St.-Yves (11.6±7.9) |
| <i>Chaerophyllum temulum</i> L.                                                   | 0.655 | 0.0027  | **  |                                                                       |
| <i>Plantago media</i> L. subsp. <i>media</i>                                      | 0.639 | 0.0005  | *** |                                                                       |
| <i>Centaurea jacea</i> L. subsp. <i>jacea</i>                                     | 0.620 | 0.0006  | *** |                                                                       |
| <i>Prunella vulgaris</i> L. subsp. <i>vulgaris</i>                                | 0.603 | 0.0018  | **  |                                                                       |
| <i>Plantago major</i> L.                                                          | 0.570 | 0.0102  | *   |                                                                       |

|                                                        |       |         |     |                                                                 |
|--------------------------------------------------------|-------|---------|-----|-----------------------------------------------------------------|
| <i>Cynosurus cristatus</i> L.                          | 0.535 | 0.0001  | *** |                                                                 |
| <i>Colchicum alpinum</i> DC.                           | 0.535 | 0.0381  | *   |                                                                 |
| <i>Dipsacus fullonum</i> L. subsp. <i>fullonum</i>     | 0.535 | 0.0302  | *   |                                                                 |
| <i>Pimpinella major</i> (L.) Huds.                     | 0.535 | 0.0393  | *   |                                                                 |
| <i>Taraxacum</i> F.H.Wigg. sect. <i>Taraxacum</i>      | 0.511 | 0.0191  | *   |                                                                 |
| <b>Grassland Type: 17.Alo_ren</b>                      |       |         |     |                                                                 |
| <i>Indicator species</i>                               |       |         |     |                                                                 |
| species with stat>0.5: 16                              | stat  | p.value |     | <i>Dominant species</i>                                         |
| species with stat>0.7: 12                              |       |         |     |                                                                 |
| <i>Alopecurus rendlei</i> Eig                          | 0.965 | 0.0001  | *** | <i>Alopecurus rendlei</i> Eig (25.8±13.9)                       |
| <i>Trifolium resupinatum</i> L.                        | 0.935 | 0.0001  | *** | <i>Trifolium resupinatum</i> L. (22.7±15.9)                     |
| <i>Persicaria lapathifolia</i> (L.) Delarbre           | 0.913 | 0.0002  | *** | <i>Elymus repens</i> (L.) Gould subsp. <i>repens</i> (19.2±9.2) |
| <i>Elymus repens</i> (L.) Gould subsp. <i>repens</i>   | 0.880 | 0.0001  | *** | <i>Carex hirta</i> L. (15.0±13.8)                               |
| <i>Ranunculus repens</i> L.                            | 0.825 | 0.0001  | *** | <i>Deschampsia cespitosa</i> (L.) P.Beauv. (13.0±6.6)           |
| <i>Scorzoneroideis autumnalis</i> (L.) Moench          | 0.746 | 0.0005  | *** | <i>Trifolium repens</i> L. (12.3±6.1)                           |
| <i>Carex hirta</i> L.                                  | 0.730 | 0.0003  | *** | <i>Ranunculus acris</i> L. (11.0±7.0)                           |
| <i>Alopecurus pratensis</i> L. subsp. <i>pratensis</i> | 0.730 | 0.0001  | *** |                                                                 |
| <i>Ranunculus acris</i> L.                             | 0.729 | 0.0001  | *** |                                                                 |
| <i>Caltha palustris</i> L.                             | 0.707 | 0.0020  | **  |                                                                 |
| <i>Carex vulpina</i> L.                                | 0.707 | 0.0032  | **  |                                                                 |
| <i>Deschampsia cespitosa</i> (L.) P.Beauv.             | 0.706 | 0.0001  | *** |                                                                 |
| <i>Poa trivialis</i> L.                                | 0.678 | 0.0007  | *** |                                                                 |
| <i>Bromus hordeaceus</i> L.                            | 0.602 | 0.0017  | **  |                                                                 |
| <i>Carex acuta</i> L.                                  | 0.577 | 0.0091  | **  |                                                                 |
| <i>Phalaris arundinacea</i> L.                         | 0.537 | 0.0066  | **  |                                                                 |

[illegible]

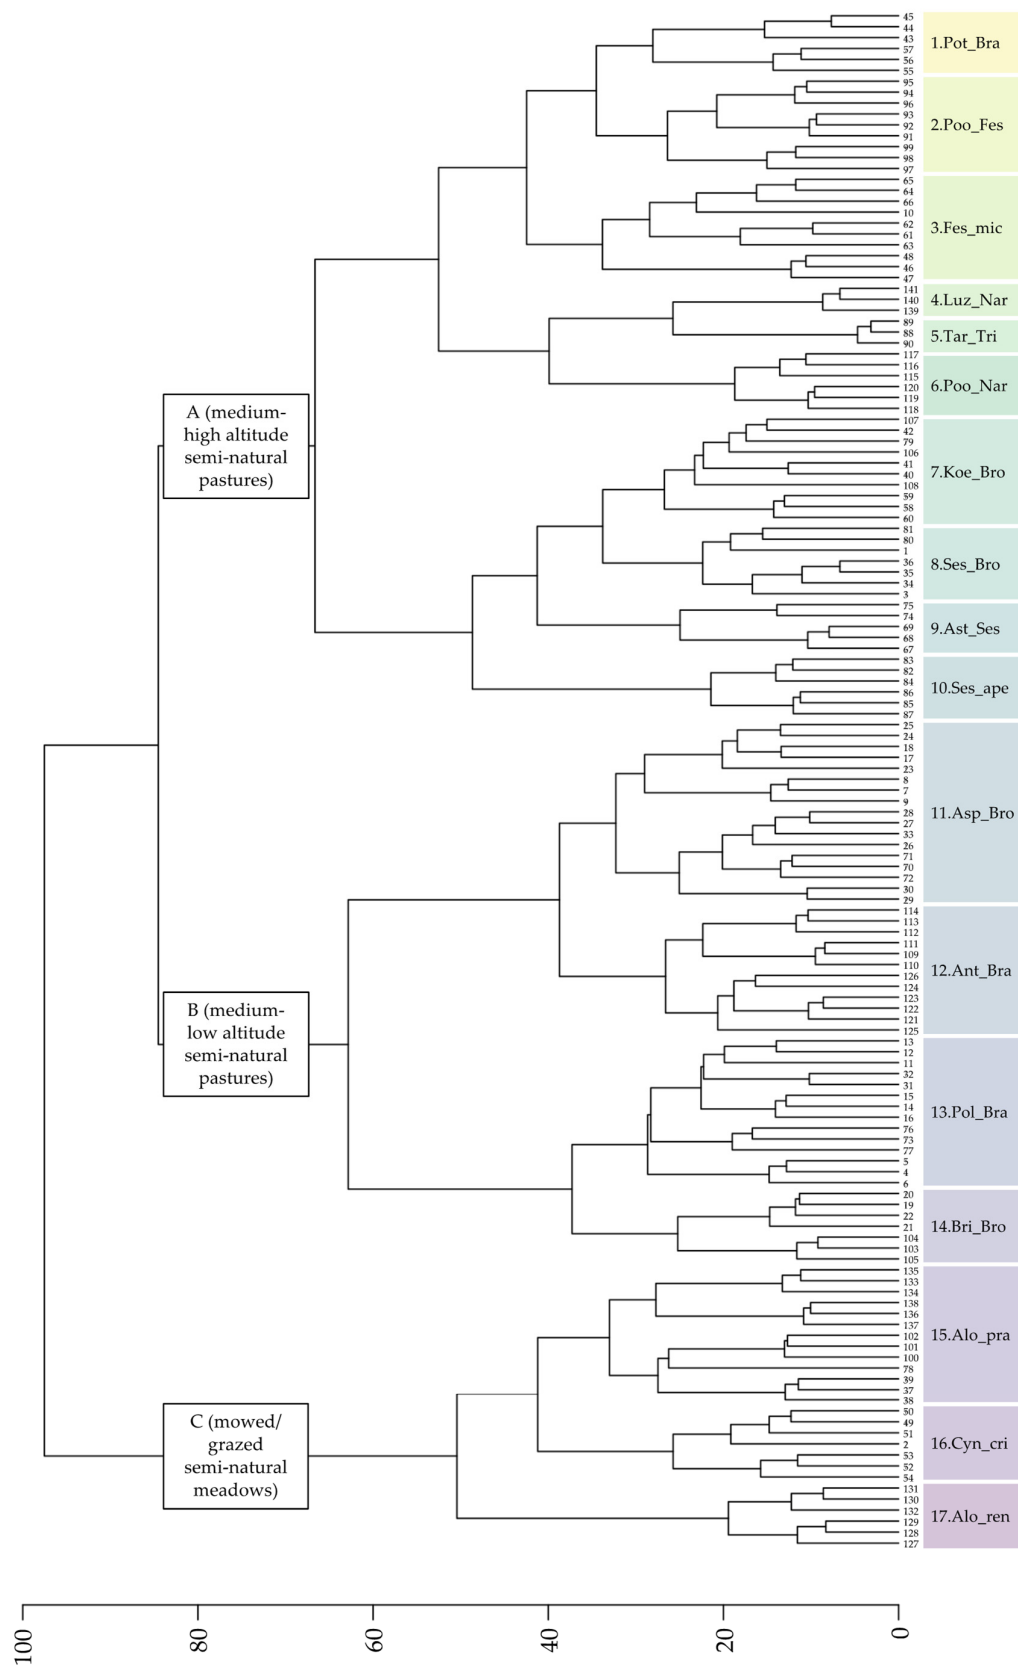

Figure S1. Dendrogram resulting from the hierarchical cluster analysis.

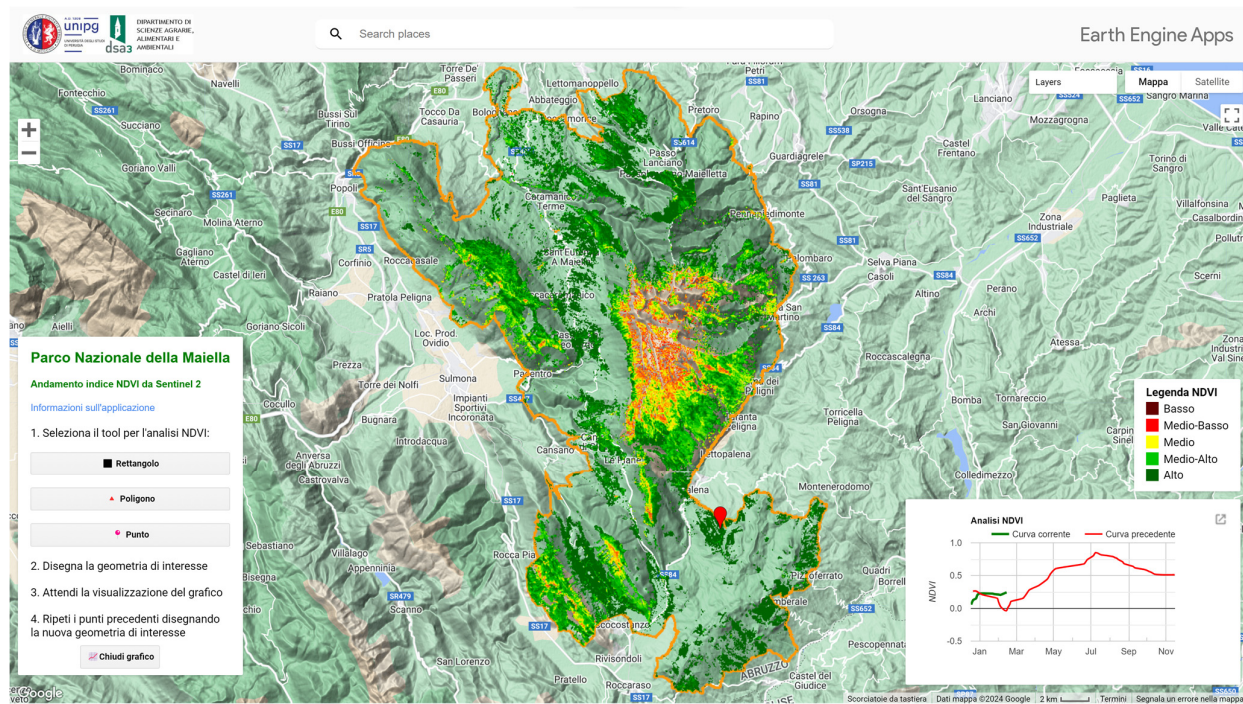

Figure S2. The interface of the 'Maiella Park GEE app' developed in this study.
